# Supplementary material for: Integrated single-cell transcriptomic analyses reveal that GPNMB-high macrophages promote PN-MES transition and impede T cell activation in GBM
Source: PubMed Central journal article supplement — eBioMedicine. 2022 Aug 30;83:104239. doi: 10.1016/j.ebiom.2022.104239 (PMC9437813; doi:10.1016/j.ebiom.2022.104239), 2022-08-30

# Supplementary Figure 1

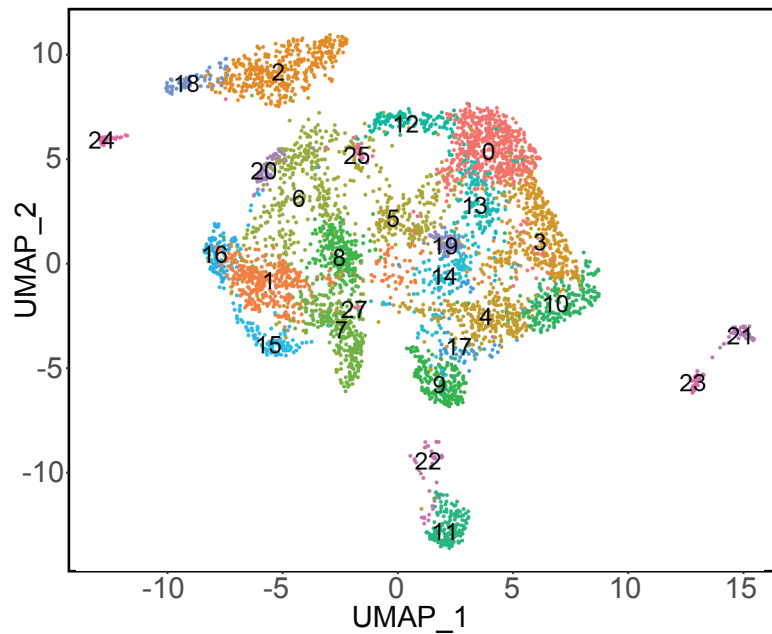

# Supplementary Figure 2

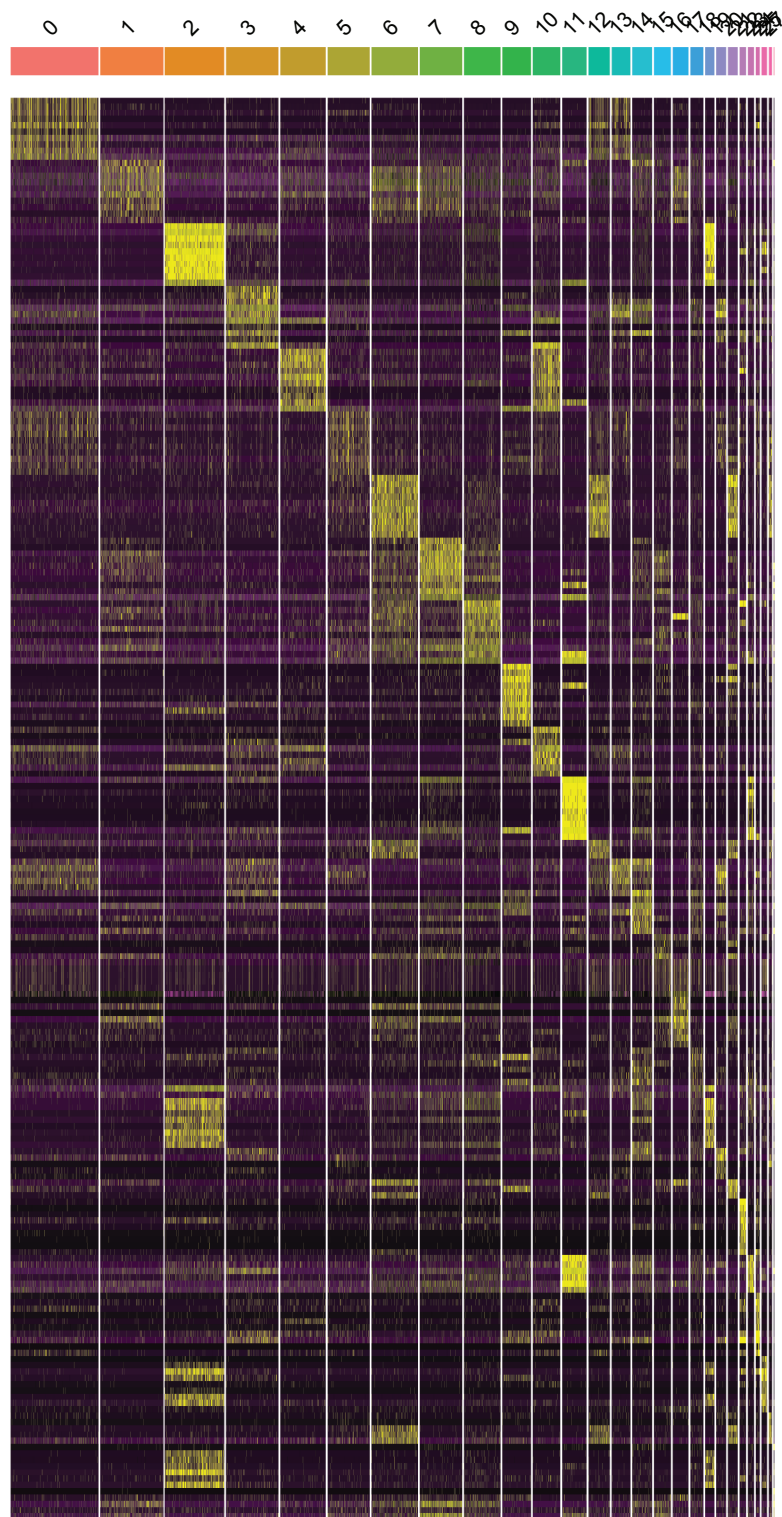

Expression

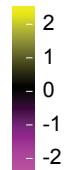

# Supplementary Figure 3

**a**

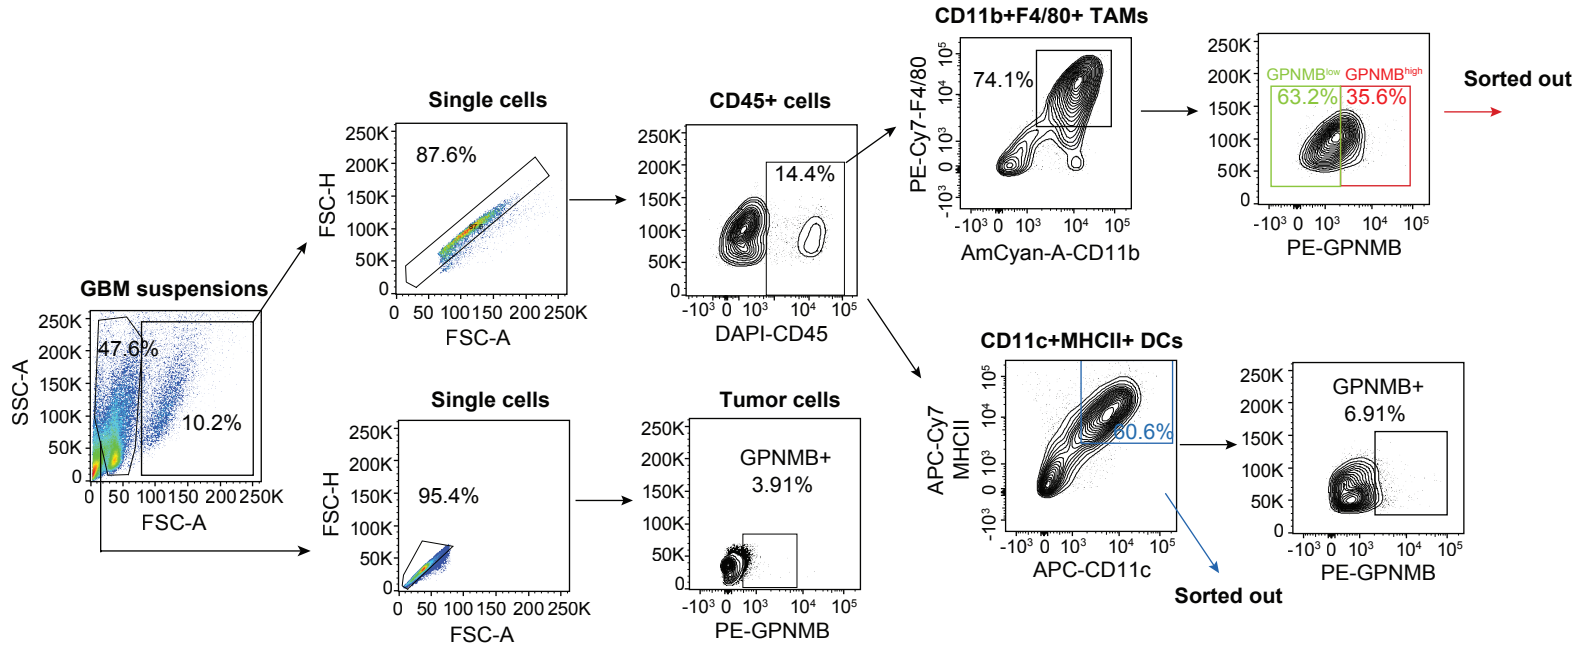

**b**

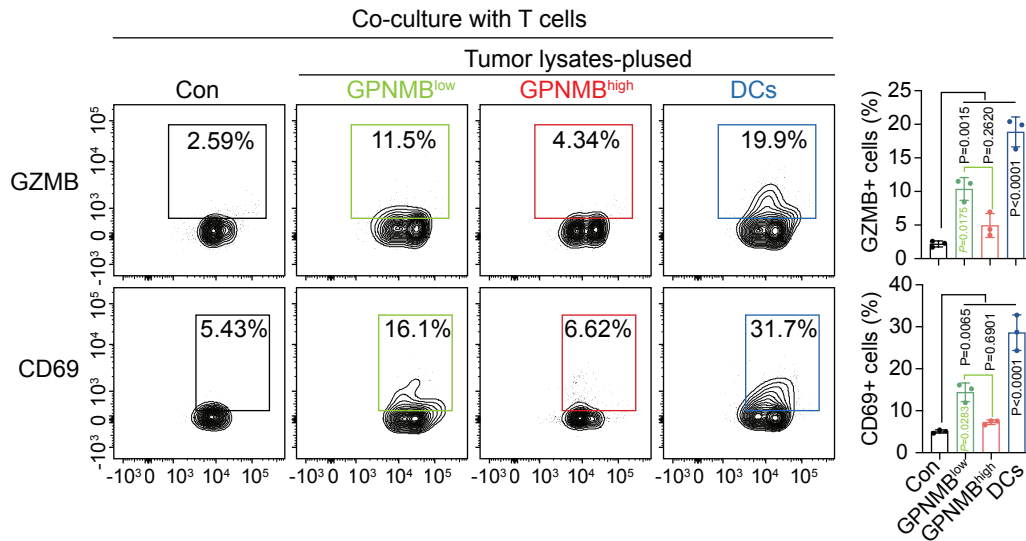

## Supplementary Figure 4

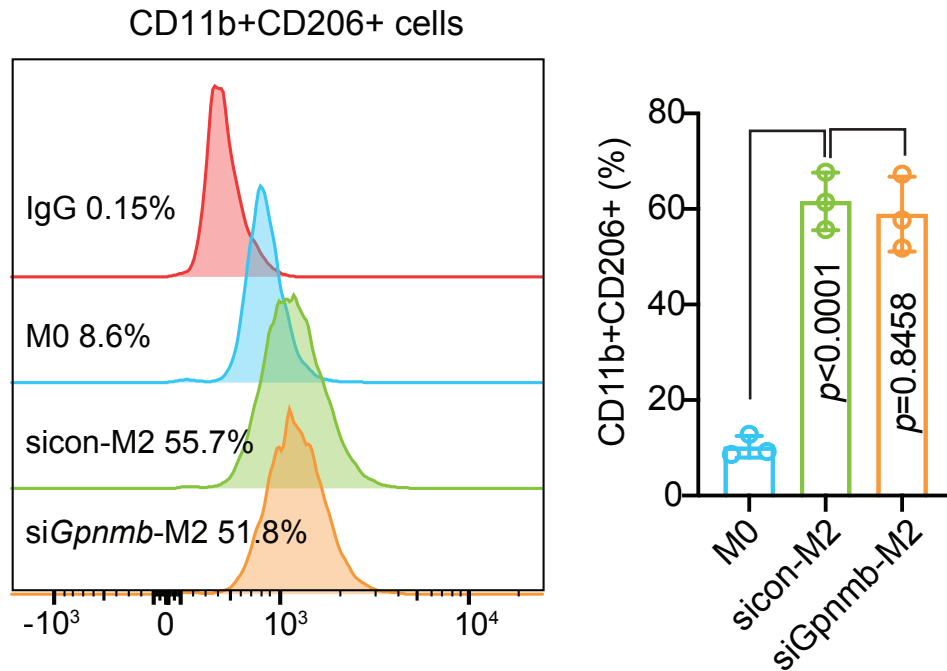

Supplement: mmc3.pdf [file mmc3.pdf]
